# Supplementary material for: Attitudes of general practitioners and medical practice assistants towards the delegation of medical services: Results of a survey in Berlin, Brandenburg and Thuringia
Source: PubMed Central journal article supplement — Gesundheitswesen. 2023 Dec 11;85(12):1115–23. [Article in German] doi: 10.1055/a-2158-8982 (PMC10713333; doi:10.1055/a-2158-8982), 2023-12-11
Supplement: 10-1055-a-2158-8982-2023-02-1807.pdf [file 10-1055-a-2158-8982-2023-02-1807.pdf]

## Onlinematerial

| <b>eSupplement.</b> Vergleich der ärztlichen Teilnehmer:innen mit sicheren Non-Respondern und der Grundgesamtheit der KBV-gelisteten Vertragsärzt:innen |                                       |                                            |                                                   |
|---------------------------------------------------------------------------------------------------------------------------------------------------------|---------------------------------------|--------------------------------------------|---------------------------------------------------|
|                                                                                                                                                         | <b>Teilnehmer:innen<br/>(n = 890)</b> | <b>sichere Non-Responder<br/>(n = 367)</b> | <b>GG (B, BRB, TH)<sup>a</sup><br/>(n = 5516)</b> |
| weiblich                                                                                                                                                | 62,0%                                 | 61,4%                                      | 59,6%                                             |
| Durchschnittsalter                                                                                                                                      | 54,4 Jahre                            | -                                          | 54,6 Jahre                                        |
| Einzelpraxis                                                                                                                                            | 57,2%                                 | 64,5%                                      | 59,0%                                             |
| Praxislage städtisch <sup>b</sup>                                                                                                                       | 62,7%                                 | 70,8%                                      | 71,2%                                             |

**KBV** Kassenärztliche Bundesvereinigung, **GG** Grundgesamtheit, **B** Berlin, **BRB** Brandenburg, **TH** Thüringen  
<sup>a</sup>Hochrechnungen auf Basis von Gesundheitsdaten der KBV (<https://gesundheitsdaten.kbv.de/cms/html/16402.php>)  
Stand 02/2022.  
<sup>b</sup>Die Einteilung erfolgte nach den Stadt- und Gemeindetypen des Bundesinstituts für Bau-, Stadt- und Raumforschung (BBSR). Eine städtische Praxislage liegt vor, wenn sich die Praxis in einer Stadt mit mehr als 20.000 Einwohnern befindet.

**Fragebogen zur Übertragung  
ärztlicher Tätigkeiten**  
(Version für Ärzt\*innen)

| <b>Angaben zu Ihrer Person und Ihrer Praxis (die Befragung erfolgt anonym)</b>                                                                                                                                                                                                                                                                                                                                                                |                                                                                |                                                                                                  |
|-----------------------------------------------------------------------------------------------------------------------------------------------------------------------------------------------------------------------------------------------------------------------------------------------------------------------------------------------------------------------------------------------------------------------------------------------|--------------------------------------------------------------------------------|--------------------------------------------------------------------------------------------------|
| Geschlecht: <input type="checkbox"/> Weiblich <input type="checkbox"/> Männlich <input type="checkbox"/> Divers                                                                                                                                                                                                                                                                                                                               | Geburtsjahr: <input style="width: 40px;" type="text"/>                         |                                                                                                  |
| In welchem Bundesland sind Sie tätig?<br><input type="checkbox"/> Berlin <input type="checkbox"/> Brandenburg <input type="checkbox"/> Thüringen <input type="checkbox"/> Anderes, und zwar _____                                                                                                                                                                                                                                             |                                                                                |                                                                                                  |
| Seit wie vielen Jahren arbeiten Sie als Hausarzt/-ärztin (nach fachärztlicher Prüfung)?<br><input type="checkbox"/> bis zu 5 Jahre <input type="checkbox"/> seit 6-10 Jahren <input type="checkbox"/> seit 11-15 Jahren <input type="checkbox"/> seit 16-20 Jahren <input type="checkbox"/> über 20 Jahre                                                                                                                                     |                                                                                |                                                                                                  |
| Wie würden Sie die Region beschreiben, in der Sie tätig sind?<br><input type="checkbox"/> Großstadt (mind. 100.000 Einw.) <input type="checkbox"/> Mittelstadt (20.000 bis unter 100.000 Einw.)<br><input type="checkbox"/> Kleinstadt (5 000 bis unter 20.000 Einw.) <input type="checkbox"/> Landgemeinde (unter 5.000 Einw.)                                                                                                               |                                                                                |                                                                                                  |
| Sie sind <input type="checkbox"/> angestellt <b>oder</b> <input type="checkbox"/> selbstständig niedergelassen in<br><input type="checkbox"/> einer Einzelpraxis <input type="checkbox"/> einer Berufsausübungsgemeinschaft/ Gemeinschaftspraxis<br><input type="checkbox"/> einer Praxisgemeinschaft <input type="checkbox"/> einem MVZ <input type="checkbox"/> einer anderen Einrichtung: _____                                            |                                                                                |                                                                                                  |
| Wie viele Scheine haben Sie persönlich durchschnittlich pro Quartal im letzten Jahr abgerechnet, bezogen auf Ihren kassenärztlichen Sitz (-anteil) bzw. auf den kassenärztlichen Sitz (-anteil), auf dem Sie angestellt sind?<br><input type="checkbox"/> bis 499 <input type="checkbox"/> 500 bis 999 <input type="checkbox"/> 1.000 bis 1.499 <input type="checkbox"/> 1.500 und mehr <input type="checkbox"/> keine Angaben/weiß ich nicht |                                                                                |                                                                                                  |
| Wie viele Wochenstunden arbeiten Sie durchschnittlich in der Praxis (bezogen auf <b>alle</b> Praxis-Tätigkeiten)?<br><input type="checkbox"/> unter 20 <input type="checkbox"/> 20 bis unter 30 <input type="checkbox"/> 30 bis unter 40<br><input type="checkbox"/> 40 bis unter 50 <input type="checkbox"/> 50 bis unter 60 <input type="checkbox"/> 60 und mehr                                                                            |                                                                                |                                                                                                  |
| In der <input style="width: 40px;" type="text"/> davon <input style="width: 40px;" type="text"/> MFA                                                                                                                                                                                                                                                                                                                                          | <input style="width: 40px;" type="text"/> Krankenpfleger/-in                   | Praxis sind nicht-ärztliche Mitarbeiter/-innen tätig, (Personenzahl):<br>Andere, und zwar: _____ |
| Davon <input style="width: 40px;" type="text"/> NäPa <input style="width: 40px;" type="text"/> VERAH                                                                                                                                                                                                                                                                                                                                          | mit folgenden <input style="width: 40px;" type="text"/> Zusatzqualifikationen: | Andere, und zwar: _____                                                                          |
| <b>Übertragung ärztlicher Leistungen an nicht-ärztliche Praxismitarbeiter/-innen</b>                                                                                                                                                                                                                                                                                                                                                          |                                                                                |                                                                                                  |
| Folgende Aufgaben/Tätigkeiten übertrage ich bereits an nicht-ärztliche Praxismitarbeiter/-innen, z.B. an Medizinische Fachangestellte (MFA) oder würde sie gerne übertragen ( <b>nur Zutreffendes ankreuzen</b> )                                                                                                                                                                                                                             |                                                                                |                                                                                                  |
|                                                                                                                                                                                                                                                                                                                                                                                                                                               | Übertrage ich bereits an MFA                                                   | Würde ich gerne an MFA übertragen                                                                |
| Orientierende Erst-Anamnese (zum Beispiel mithilfe eines vorgefertigten Anamnesebogens)                                                                                                                                                                                                                                                                                                                                                       | <input type="checkbox"/>                                                       | <input type="checkbox"/>                                                                         |
| (Telefon-)Triage zur Feststellung der Dringlichkeit einer ärztlichen Konsultation nach festgelegtem Ablaufschema                                                                                                                                                                                                                                                                                                                              | <input type="checkbox"/>                                                       | <input type="checkbox"/>                                                                         |
| Selbständige komplette Durchführung der DMP-Kontrollen                                                                                                                                                                                                                                                                                                                                                                                        | <input type="checkbox"/>                                                       | <input type="checkbox"/>                                                                         |
| Selbständige Routine-Kontrollen bei chronischen Erkrankungen (außerhalb DMP)                                                                                                                                                                                                                                                                                                                                                                  | <input type="checkbox"/>                                                       | <input type="checkbox"/>                                                                         |
| EKG-Vorbefundung                                                                                                                                                                                                                                                                                                                                                                                                                              | <input type="checkbox"/>                                                       | <input type="checkbox"/>                                                                         |
| Impfungen inkl. Aufklärung                                                                                                                                                                                                                                                                                                                                                                                                                    | <input type="checkbox"/>                                                       | <input type="checkbox"/>                                                                         |
| Selbständige Hausbesuche                                                                                                                                                                                                                                                                                                                                                                                                                      | <input type="checkbox"/>                                                       | <input type="checkbox"/>                                                                         |

**Fragebogen zur Übertragung  
ärztlicher Tätigkeiten**  
(Version für Ärzt\*innen)

|                                                                                                                                      |                          |                          |                          |
|--------------------------------------------------------------------------------------------------------------------------------------|--------------------------|--------------------------|--------------------------|
| Anderes, und zwar: _____                                                                                                             | <input type="checkbox"/> | <input type="checkbox"/> |                          |
| <b>In meinen Augen wäre eine Übertragung weiterer Aufgaben/Tätigkeiten an nicht-ärztliche Praxismitarbeiter/-innen abhängig von:</b> |                          |                          |                          |
|                                                                                                                                      | Ja                       | Nein                     | Vielleicht               |
| Persönlicher Eignung                                                                                                                 | <input type="checkbox"/> | <input type="checkbox"/> | <input type="checkbox"/> |
| Zusätzlicher Qualifizierung                                                                                                          | <input type="checkbox"/> | <input type="checkbox"/> | <input type="checkbox"/> |
| Schaffung eines höher qualifizierten, nicht-ärztlichen Berufs                                                                        | <input type="checkbox"/> | <input type="checkbox"/> | <input type="checkbox"/> |
| Erweiterung der Delegationsvereinbarung                                                                                              | <input type="checkbox"/> | <input type="checkbox"/> | <input type="checkbox"/> |
| Zusätzlicher Abrechnungsmöglichkeit                                                                                                  | <input type="checkbox"/> | <input type="checkbox"/> | <input type="checkbox"/> |
| Zusätzlichem finanziellen Anreiz für die/den MFA                                                                                     | <input type="checkbox"/> | <input type="checkbox"/> | <input type="checkbox"/> |
| Anderes, und zwar: _____                                                                                                             |                          |                          |                          |

**Fallbeispiele**

**Fall 1:** Eine Patientin, 26 Jahre alt, stellt sich in der Praxis mit Brennen beim Wasserlassen vor. Sie hatte ähnliche Beschwerden bereits vor einem Jahr und hat damals ein Antibiotikum erhalten, das sofort half. Sie möchte nun erneut ein Rezept für das gleiche Antibiotikum sowie eine AU für einen Tag.

Ich könnte mir vorstellen, dass die/der MFA **ohne ärztlichen Kontakt** selbständig nach einem festgelegten Ablauf-/ Entscheidungsschema ...

|                                                                                              | Ja                       | Nein                     | Vielleicht               |
|----------------------------------------------------------------------------------------------|--------------------------|--------------------------|--------------------------|
| ... bei dieser Patientin eine symptombezogene Anamnese erhebt                                | <input type="checkbox"/> | <input type="checkbox"/> | <input type="checkbox"/> |
| ... einen Urin-Schnelltest durchführt und diesen selbst auswertet                            | <input type="checkbox"/> | <input type="checkbox"/> | <input type="checkbox"/> |
| ... die gewünschte AU ausstellt                                                              | <input type="checkbox"/> | <input type="checkbox"/> | <input type="checkbox"/> |
| ... ein Rezept für das gleiche Antibiotikum ausstellt                                        | <input type="checkbox"/> | <input type="checkbox"/> | <input type="checkbox"/> |
| ... anhand vorgefertigter Kriterien entscheidet, ob sie/er mir die Patientin vorstellen muss | <input type="checkbox"/> | <input type="checkbox"/> | <input type="checkbox"/> |

**Fall 2:** Eine Patientin, 62 Jahre alt, stellt sich in der Praxis zum DMP „Nicht-insulinpflichtiger Diabetes mellitus Typ 2“ vor. Sie hat keine aktuellen Beschwerden oder Anliegen. Sie benötigt lediglich ein Folgerezept für Metformin.

Ich könnte mir vorstellen, dass die/der MFA **ohne ärztlichen Kontakt** selbständig nach einem festgelegten Ablauf-/ Entscheidungsschema ...

|                                                                                                                     | Ja                       | Nein                     | Vielleicht               |
|---------------------------------------------------------------------------------------------------------------------|--------------------------|--------------------------|--------------------------|
| ... bei dieser Patientin alle Untersuchungen, Dokumentation und Beratungen entsprechend dem DMP Diabetes durchführt | <input type="checkbox"/> | <input type="checkbox"/> | <input type="checkbox"/> |
| ... ein Rezept für Metformin ausstellt                                                                              | <input type="checkbox"/> | <input type="checkbox"/> | <input type="checkbox"/> |
| ... weitere Kontrolluntersuchungen veranlasst wie zum Beispiel die regelmäßige Untersuchung beim Augenarzt          | <input type="checkbox"/> | <input type="checkbox"/> | <input type="checkbox"/> |

**Fragebogen zur Übertragung  
ärztlicher Tätigkeiten**  
(Version für Ärzt\*innen)

|                                                                                                                                                                                         |                          |                          |                          |
|-----------------------------------------------------------------------------------------------------------------------------------------------------------------------------------------|--------------------------|--------------------------|--------------------------|
| ... anhand vorgefertigter Kriterien entscheidet, ob sie/er mir die Patientin vorstellen muss                                                                                            | <input type="checkbox"/> | <input type="checkbox"/> | <input type="checkbox"/> |
| <b>Fall 3:</b> Ein multimorbider Patient, 72 Jahre alt, stellt sich regelmäßig mindestens 1x/Quartal in der Praxis zur Routinekontrolle vor. Er ist alleinlebend und selbst versorgend. |                          |                          |                          |
| Werden in Ihrer Praxis bei diesem Patienten die Selbstversorgungsfähigkeiten sowie mögliche Funktionseinschränkungen (z.B. auf motorischer, emotioneller und kognitiver Ebene) erhoben? |                          |                          |                          |
| <input type="checkbox"/> Nein; <input type="checkbox"/> Ja, einmalig <input type="checkbox"/> Ja, wiederholt                                                                            |                          |                          |                          |
| <b><u>Nur falls ja:</u></b>                                                                                                                                                             |                          |                          |                          |
| Dafür wählen wir in unserer Praxis folgendes Vorgehen:                                                                                                                                  |                          |                          |                          |
| <input type="checkbox"/> Das geriatrische Basis-Assessment (EBM-Ziffer 03360)                                                                                                           |                          |                          |                          |
| <input type="checkbox"/> und zwar nach strukturiertem Ablaufschema oder                                                                                                                 |                          |                          |                          |
| <input type="checkbox"/> eher unstrukturiert                                                                                                                                            |                          |                          |                          |
| <input type="checkbox"/> Das beurteilen wir im Rahmen der üblichen Konsultation                                                                                                         |                          |                          |                          |
| In unserer Praxis wird diese Erhebung durchgeführt durch                                                                                                                                |                          |                          |                          |
| <input type="checkbox"/> eine/n Ärztin/Arzt; <input type="checkbox"/> ein/e MFA ; <input type="checkbox"/> teils/teils                                                                  |                          |                          |                          |
| <b>Folgende Beurteilungen finde ich für diesen Patienten in Fall 3 sinnvoll und/oder führe sie bereits durch...<br/>(nur Zutreffendes ankreuzen)</b>                                    |                          |                          |                          |
|                                                                                                                                                                                         | Finde ich sinnvoll       | Führen wir bereits durch |                          |
|                                                                                                                                                                                         |                          | durch Ärztin/Arzt        | durch MFA                |
| Selbsthilfefähigkeit, z. B. Barthel-Index                                                                                                                                               | <input type="checkbox"/> | <input type="checkbox"/> | <input type="checkbox"/> |
| Mobilität, z.B. Timed Up&Go-Test                                                                                                                                                        | <input type="checkbox"/> | <input type="checkbox"/> | <input type="checkbox"/> |
| Hirnleistungsstörungen, z.B. MMST                                                                                                                                                       | <input type="checkbox"/> | <input type="checkbox"/> | <input type="checkbox"/> |
| Psychosoziale Situation                                                                                                                                                                 | <input type="checkbox"/> | <input type="checkbox"/> | <input type="checkbox"/> |
| Ernährungssituation                                                                                                                                                                     | <input type="checkbox"/> | <input type="checkbox"/> | <input type="checkbox"/> |
| Körperpflege                                                                                                                                                                            | <input type="checkbox"/> | <input type="checkbox"/> | <input type="checkbox"/> |
| Hilfsmittelbedarf                                                                                                                                                                       | <input type="checkbox"/> | <input type="checkbox"/> | <input type="checkbox"/> |
| Hör- und Sehleistung                                                                                                                                                                    | <input type="checkbox"/> | <input type="checkbox"/> | <input type="checkbox"/> |
| Impfstatus                                                                                                                                                                              | <input type="checkbox"/> | <input type="checkbox"/> | <input type="checkbox"/> |
| Medikationsstatus                                                                                                                                                                       | <input type="checkbox"/> | <input type="checkbox"/> | <input type="checkbox"/> |

**Herzlichen Dank für Ihre Teilnahme!**

**Fragebogen zur Übertragung  
ärztlicher Tätigkeiten**  
(Version für MFA)

| <b>Angaben zu Ihrer Person und Ihrer Praxis (die Befragung erfolgt anonym)</b>                                                                                                                                                                                                                                                                                     |                                                        |
|--------------------------------------------------------------------------------------------------------------------------------------------------------------------------------------------------------------------------------------------------------------------------------------------------------------------------------------------------------------------|--------------------------------------------------------|
| Geschlecht: <input type="checkbox"/> Weiblich <input type="checkbox"/> Männlich <input type="checkbox"/> Divers                                                                                                                                                                                                                                                    | Geburtsjahr: <input style="width: 60px;" type="text"/> |
| In welchem Bundesland sind Sie tätig?<br><input type="checkbox"/> Berlin <input type="checkbox"/> Brandenburg <input type="checkbox"/> Thüringen <input type="checkbox"/> Anderes, und zwar _____                                                                                                                                                                  |                                                        |
| Seit wie vielen Jahren arbeiten Sie als medizinische/r Fachangestellte/r (nach Ausbildung)?<br><input type="checkbox"/> bis zu 5 Jahre <input type="checkbox"/> seit 6-10 Jahren <input type="checkbox"/> seit 11-15 Jahren <input type="checkbox"/> seit 16-20 Jahren <input type="checkbox"/> über 20 Jahre                                                      |                                                        |
| Wie würden Sie die Region beschreiben, in der Sie tätig sind?<br><input type="checkbox"/> Großstadt (mind. 100.000 Einw.) <input type="checkbox"/> Mittelstadt (20.000 bis unter 100.000 Einw.)<br><input type="checkbox"/> Kleinstadt (5 000 bis unter 20.000 Einw.) <input type="checkbox"/> Landgemeinde (unter 5.000 Einw.)                                    |                                                        |
| Wie viele Wochenstunden arbeiten Sie durchschnittlich in der Praxis (bezogen auf <b>alle</b> Praxis-Tätigkeiten)?<br><input type="checkbox"/> unter 20 <input type="checkbox"/> 20 bis unter 30 <input type="checkbox"/> 30 bis unter 40<br><input type="checkbox"/> 40 bis unter 50 <input type="checkbox"/> 50 bis unter 60 <input type="checkbox"/> 60 und mehr |                                                        |
| Neben Ihrer Ausbildung als Medizinische/r Fachangestellte/r haben Sie folgende Qualifikation:<br><input type="checkbox"/> Keine <input type="checkbox"/> NäPa <input type="checkbox"/> VERAH <input type="checkbox"/> Praxismanager/-in<br><input type="checkbox"/> Andere, und zwar: _____                                                                        |                                                        |

| <b>Übertragung ärztlicher Leistungen an nicht-ärztliche Praxismitarbeiter/-innen</b>                                                     |                          |                                         |
|------------------------------------------------------------------------------------------------------------------------------------------|--------------------------|-----------------------------------------|
| Folgende Aufgaben/Tätigkeiten übernehme ich bereits oder könnte ich mir vorstellen zu übernehmen:<br><b>(nur Zutreffendes ankreuzen)</b> |                          |                                         |
|                                                                                                                                          | Übernehme ich bereits    | Könnte ich mir vorstellen zu übernehmen |
| Orientierende Erst-Anamnese (zum Beispiel mithilfe eines vorgefertigten Anamnesebogens)                                                  | <input type="checkbox"/> | <input type="checkbox"/>                |
| (Telefon-)Triage zur Feststellung der Dringlichkeit einer ärztlichen Konsultation nach festgelegtem Ablaufschema                         | <input type="checkbox"/> | <input type="checkbox"/>                |
| Selbständige komplette Durchführung der DMP-Kontrollen                                                                                   | <input type="checkbox"/> | <input type="checkbox"/>                |
| Selbständige Routine-Kontrollen bei chronischen Erkrankungen (außerhalb DMP)                                                             | <input type="checkbox"/> | <input type="checkbox"/>                |
| EKG-Vorbefundung                                                                                                                         | <input type="checkbox"/> | <input type="checkbox"/>                |
| Impfungen inkl. Aufklärung                                                                                                               | <input type="checkbox"/> | <input type="checkbox"/>                |
| Selbständige Hausbesuche                                                                                                                 | <input type="checkbox"/> | <input type="checkbox"/>                |
| Anderes, und zwar: _____                                                                                                                 | <input type="checkbox"/> | <input type="checkbox"/>                |

**Fragebogen zur Übertragung  
ärztlicher Tätigkeiten**  
(Version für MFA)

**In meinen Augen wäre eine Übertragung weiterer Aufgaben/Tätigkeiten an nicht-ärztliche Praxismitarbeiter/-innen abhängig von:**

|                                                               | Ja                       | Nein                     | Vielleicht               |
|---------------------------------------------------------------|--------------------------|--------------------------|--------------------------|
| Persönlicher Eignung                                          | <input type="checkbox"/> | <input type="checkbox"/> | <input type="checkbox"/> |
| Zusätzlicher Qualifizierung                                   | <input type="checkbox"/> | <input type="checkbox"/> | <input type="checkbox"/> |
| Schaffung eines höher qualifizierten, nicht-ärztlichen Berufs | <input type="checkbox"/> | <input type="checkbox"/> | <input type="checkbox"/> |
| Erweiterung der Delegationsvereinbarung                       | <input type="checkbox"/> | <input type="checkbox"/> | <input type="checkbox"/> |
| Zusätzlicher Abrechnungsmöglichkeit                           | <input type="checkbox"/> | <input type="checkbox"/> | <input type="checkbox"/> |
| Zusätzlichem finanziellen Anreiz für die/den MFA              | <input type="checkbox"/> | <input type="checkbox"/> | <input type="checkbox"/> |

Anderes, und zwar: \_\_\_\_\_

**Fallbeispiele**

**Fall 1:** Eine Patientin, 26 Jahre alt, stellt sich in der Praxis mit Brennen beim Wasserlassen vor. Sie hatte ähnliche Beschwerden bereits vor einem Jahr und hat damals ein Antibiotikum erhalten, das sofort half. Sie möchte nun erneut ein Rezept für das gleiche Antibiotikum sowie eine AU für einen Tag.

Ich könnte mir vorstellen, dass ich **ohne ärztlichen Kontakt** selbständig nach einem festgelegten Ablauf-/ Entscheidungsschema ...

|                                                                                                          | Ja                       | Nein                     | Vielleicht               |
|----------------------------------------------------------------------------------------------------------|--------------------------|--------------------------|--------------------------|
| ... bei dieser Patientin eine symptombezogene Anamnese erhebe                                            | <input type="checkbox"/> | <input type="checkbox"/> | <input type="checkbox"/> |
| ... einen Urin-Schnelltest durchführe und diesen selbst auswerte                                         | <input type="checkbox"/> | <input type="checkbox"/> | <input type="checkbox"/> |
| ... die gewünschte AU ausstelle                                                                          | <input type="checkbox"/> | <input type="checkbox"/> | <input type="checkbox"/> |
| ... ein Rezept für das gleiche Antibiotikum ausstelle                                                    | <input type="checkbox"/> | <input type="checkbox"/> | <input type="checkbox"/> |
| ... anhand vorgefertigter Kriterien entscheide, ob ich die Patientin der Ärztin/dem Arzt vorstellen muss | <input type="checkbox"/> | <input type="checkbox"/> | <input type="checkbox"/> |

**Fall 2:** Eine Patientin, 62 Jahre alt, stellt sich in der Praxis zum DMP „Nicht-insulinpflichtiger Diabetes mellitus Typ 2“ vor. Sie hat keine aktuellen Beschwerden oder Anliegen. Sie benötigt lediglich ein Folgerezept für Metformin.

Ich könnte mir vorstellen, dass ich **ohne ärztlichen Kontakt** selbständig nach einem festgelegten Ablauf-/ Entscheidungsschema ...

|                                                                                                                     | Ja                       | Nein                     | Vielleicht               |
|---------------------------------------------------------------------------------------------------------------------|--------------------------|--------------------------|--------------------------|
| ... bei dieser Patientin alle Untersuchungen, Dokumentation und Beratungen entsprechend dem DMP Diabetes durchführe | <input type="checkbox"/> | <input type="checkbox"/> | <input type="checkbox"/> |
| ... ein Rezept für Metformin ausstelle                                                                              | <input type="checkbox"/> | <input type="checkbox"/> | <input type="checkbox"/> |
| ... weitere Kontrolluntersuchungen veranlasse wie zum Beispiel die regelmäßige Untersuchung beim Augenarzt          | <input type="checkbox"/> | <input type="checkbox"/> | <input type="checkbox"/> |
| ... anhand vorgefertigter Kriterien entscheidet, ob ich die Patientin der Ärztin/ dem Arzt vorstellen muss          | <input type="checkbox"/> | <input type="checkbox"/> | <input type="checkbox"/> |

**Fragebogen zur Übertragung  
ärztlicher Tätigkeiten**  
(Version für MFA)

**Fall 3:** Ein multimorbider Patient, 72 Jahre alt, stellt sich regelmäßig mindestens 1x/Quartal in der Praxis zur Routinekontrolle vor. Er ist alleinlebend und selbst versorgend.

Werden in Ihrer Praxis bei diesem Patienten die Selbstversorgungsfähigkeiten sowie mögliche Funktionseinschränkungen (z.B. auf motorischer, emotioneller und kognitiver Ebene) erhoben?

- Nein;     Ja, einmalig     Ja, wiederholt

**Nur falls ja:**

Dafür wählen wir in unserer Praxis folgendes Vorgehen:

- Das geriatrische Basis-Assessment (EBM-Ziffer 03360)  
      und zwar nach strukturiertem Ablaufschema oder  
      eher unstrukturiert
- Das beurteilen wir im Rahmen der üblichen Konsultation

In unserer Praxis wird diese Erhebung durchgeführt durch

- eine/n Ärztin/Arzt;     ein/e MFA ;     teils/teils

Folgende Beurteilungen finde ich für diesen Patienten in Fall 3 sinnvoll und/oder führe sie bereits durch... **(nur Zutreffendes ankreuzen)**

|                                           | Finde ich sinnvoll       | Führen wir bereits durch |                          |
|-------------------------------------------|--------------------------|--------------------------|--------------------------|
|                                           |                          | durch Ärztin/Arzt        | durch MFA                |
| Selbsthilfefähigkeit, z. B. Barthel-Index | <input type="checkbox"/> | <input type="checkbox"/> | <input type="checkbox"/> |
| Mobilität, z.B. Timed Up & Go-Test        | <input type="checkbox"/> | <input type="checkbox"/> | <input type="checkbox"/> |
| Hirnleistungsstörungen, z.B. MMST         | <input type="checkbox"/> | <input type="checkbox"/> | <input type="checkbox"/> |
| Psychosoziale Situation                   | <input type="checkbox"/> | <input type="checkbox"/> | <input type="checkbox"/> |
| Ernährungssituation                       | <input type="checkbox"/> | <input type="checkbox"/> | <input type="checkbox"/> |
| Körperpflege                              | <input type="checkbox"/> | <input type="checkbox"/> | <input type="checkbox"/> |
| Hilfsmittelbedarf                         | <input type="checkbox"/> | <input type="checkbox"/> | <input type="checkbox"/> |
| Hör- und Sehleistung                      | <input type="checkbox"/> | <input type="checkbox"/> | <input type="checkbox"/> |
| Impfstatus                                | <input type="checkbox"/> | <input type="checkbox"/> | <input type="checkbox"/> |
| Medikationsstatus                         | <input type="checkbox"/> | <input type="checkbox"/> | <input type="checkbox"/> |

**Herzlichen Dank für Ihre Teilnahme!**
